# Supplementary material for: Optimization of analytical method greenness scores: a case study of amino acid enantioseparations with carbonated aqueous systems
Source: Royal Society of Chemistry journal article supplement (doi:10.1039/d3gc03005a), 2023-10-17
Supplement: d3gc03005a1.pdf [file d3gc03005a1.pdf]

Electronic Supplementary Information for

**Optimization of Analytical Method Greenness Scores:  
A Case Study of Amino Acid Enantioseparations with  
Carbonated Aqueous Systems**

Troy T. Handlovic, M. Farooq Wahab, Bailey C. Glass, Daniel W. Armstrong\*

*Department of Chemistry and Biochemistry, University of Texas at Arlington, 76019, USA*

\* Corresponding Author: [sec4dwa@uta.edu](mailto:sec4dwa@uta.edu)

Table ESI-1: Chromatographic Figures of Merit for Carbonated H<sub>2</sub>O Conditions

| Compound Number | Amino Acid (D-/L-)                       | $t_{r2}$ (min) | $\alpha$ | $N_1$ | $N_2$ | $R_s$ |
|-----------------|------------------------------------------|----------------|----------|-------|-------|-------|
| 1               | Alanine                                  | 1.55           | 1.18     | 18850 | 16900 | 1.86  |
| 2               | Valine                                   | 1.71           | 1.11     | 14150 | 11000 | 1.19  |
| 3               | Leucine                                  | 2.34           | 1.27     | 10450 | 5950  | 2.81  |
| 4               | Isoleucine                               | 2.24           | 1.23     | 10300 | 6750  | 2.44  |
| 5               | Phenylalanine                            | 2.58           | 1.11     | 8250  | 3850  | 1.18  |
| 6               | Proline                                  | 2.73           | 2.08     | 12350 | 3250  | 7.01  |
| 7               | Tryptophan                               | 3.67           | 1.13     | 6400  | 2200  | 1.27  |
| 8               | Serine                                   | 1.31           | 1.05     | -     | -     | 0.51  |
| 9               | Threonine                                | 1.35           | 1.04     | -     | -     | 0.54  |
| 10              | Methionine                               | 2.01           | 1.32     | 12800 | 8400  | 3.24  |
| 11              | Cysteine                                 | 1.12           | 1.17     | -     | -     | 1.12  |
| 12              | Asparagine                               | 1.43           | 1.18     | 13650 | 13150 | 1.37  |
| 13              | Glutamine                                | 1.49           | 1.58     | 16900 | 14500 | 1.58  |
| 14              | Aspartic Acid                            | 1.02           | 1.00     | -     | -     | 0.00  |
| 15              | Lysine                                   | 10.0           | 1.08     | -     | -     | 1.06  |
| 16              | Tyrosine                                 | 1.94           | 1.08     | 9750  | 5250  | 0.79  |
| 17              | Glutamic Acid                            | 1.28           | 1.29     | 12900 | 13900 | 1.44  |
| 18              | Arginine                                 | 13.6           | 1.12     | -     | -     | 2.32  |
| 19              | Histidine                                | 21.9           | 1.00     | -     | -     | 0.00  |
| 20              | o-tyrosine                               | 2.29           | 1.10     | 10150 | 5850  | 1.10  |
| 21              | Norleucine                               | 2.44           | 1.33     | 11450 | 5150  | 3.33  |
| 22              | 2-Fluorophenylalanine                    | 2.70           | 1.12     | 7550  | 3400  | 1.22  |
| 23              | 3-Fluorophenylalanine                    | 2.68           | 1.22     | 7800  | 3150  | 2.02  |
| 24              | 2-Phenylglycine                          | 2.63           | 2.24     | 10800 | 1750  | 5.72  |
| 25              | 3,4-Dihydroxyphenylalanine               | 2.14           | 1.35     | 1850  | 850   | 1.26  |
| 26              | 6-Methyl-Tryptophan                      | 5.39           | 1.06     | 2900  | 950   | 1.06  |
| 27              | 2-Fluorophenylglycine                    | 2.06           | 1.67     | 10800 | 3500  | 4.28  |
| 28              | Norvaline                                | 1.95           | 1.35     | 15350 | 8900  | 3.58  |
| 29              | Ethionine                                | 2.45           | 1.33     | 10000 | 5400  | 3.33  |
| 30              | $\alpha$ -methyl-m-tyrosine-methyl ester | 2.26           | 1.25     | 7600  | 2300  | 1.82  |
| 31              | 2-aminobutyric acid                      | 1.58           | 1.16     | 18300 | 15000 | 1.68  |
| 32              | p-Bromo-phenylalanine                    | 4.01           | 1.03     | -     | -     | 0.37  |
| 33              | Pipecolic acid                           | 2.91           | 1.38     | 8100  | 3050  | 3.33  |
| 34              | 5-Fluoro-Tryptophan                      | 4.29           | 1.22     | 5250  | 1500  | 1.85  |
| 35              | m-tyrosine                               | 2.34           | 1.49     | 10650 | 2250  | 3.28  |
| 36              | Homoserine                               | 1.42           | 1.11     | 16850 | 15750 | 0.92  |
| 37              | p-Nitro-phenylalanine                    | 3.12           | 1.05     | -     | -     | 0.58  |
| 38              | p-Fluoro-phenylalanine                   | 2.69           | 1.14     | 6350  | 2450  | 1.18  |

Table ESI-2: Chromatographic Figures of Merit for Carbonated 80/20 H<sub>2</sub>O/MeOH Conditions

| Compound Number | Amino Acid (D-/L-)                       | $t_{r2}$ (min) | $\alpha$ | $N_1$ | $N_2$ | $R_s$ |
|-----------------|------------------------------------------|----------------|----------|-------|-------|-------|
| 1               | Alanine                                  | 1.58           | 1.31     | 17750 | 14850 | 2.89  |
| 2               | Valine                                   | 1.61           | 1.19     | 14650 | 12100 | 1.78  |
| 3               | Leucine                                  | 1.94           | 1.46     | 13150 | 7400  | 3.99  |
| 4               | Isoleucine                               | 1.90           | 1.43     | 12050 | 7650  | 3.72  |
| 5               | Phenylalanine                            | 2.12           | 1.14     | 9650  | 5800  | 1.46  |
| 6               | Proline                                  | 2.98           | 2.74     | 11950 | 3950  | 9.97  |
| 7               | Tryptophan                               | 2.86           | 1.17     | 7700  | 3650  | 1.73  |
| 8               | Serine                                   | 1.34           | 1.10     | -     | -     | 0.79  |
| 9               | Threonine                                | 1.35           | 1.10     | -     | -     | 0.66  |
| 10              | Methionine                               | 1.96           | 1.54     | 12650 | 8500  | 4.74  |
| 11              | Cysteine                                 | 1.48           | 1.27     | 9050  | 8400  | 1.69  |
| 12              | Asparagine                               | 1.51           | 1.27     | 11600 | 9850  | 1.93  |
| 13              | Glutamine                                | 1.53           | 2.01     | 14700 | 12700 | 2.01  |
| 14              | Aspartic Acid                            | 1.29           | 1.00     | -     | -     | 0.00  |
| 15              | Lysine                                   | 8.70           | 1.12     | -     | -     | 1.28  |
| 16              | Tyrosine                                 | 1.85           | 1.13     | 9400  | 6800  | 1.21  |
| 17              | Glutamic Acid                            | 1.37           | 1.35     | 12000 | 10750 | 1.95  |
| 18              | Arginine                                 | 10.8           | 1.15     | -     | -     | 1.66  |
| 19              | Histidine                                | 11.6           | 1.00     | -     | -     | 0.00  |
| 20              | o-tyrosine                               | 2.07           | 1.13     | 10600 | 7350  | 1.41  |
| 21              | Norleucine                               | 2.08           | 1.56     | 13600 | 7000  | 4.97  |
| 22              | 2-Fluorophenylalanine                    | 2.11           | 1.17     | 9650  | 5650  | 1.67  |
| 23              | 3-Fluorophenylalanine                    | 2.24           | 1.34     | 9700  | 4800  | 3.01  |
| 24              | 2-Phenylglycine                          | 2.78           | 2.96     | 11400 | 2400  | 8.19  |
| 25              | 3,4-Dihydroxyphenylalanine               | 2.12           | 1.51     | 2000  | 850   | 1.68  |
| 26              | 6-Methyl-Tryptophan                      | 3.48           | 1.62     | 5600  | 2250  | 1.62  |
| 27              | 2-Fluorophenylglycine                    | 2.03           | 2.13     | 11350 | 4400  | 6.14  |
| 28              | Norvaline                                | 1.88           | 1.60     | 15350 | 9100  | 5.15  |
| 29              | Ethionine                                | 2.07           | 1.50     | 12300 | 7950  | 4.59  |
| 30              | $\alpha$ -methyl-m-tyrosine-methyl ester | 2.08           | 1.35     | 9250  | 3250  | 2.55  |
| 31              | 2-aminobutyric acid                      | 1.58           | 1.26     | 16550 | 13850 | 2.41  |
| 32              | p-Bromo-phenylalanine                    | 2.87           | 1.06     | -     | -     | 1.14  |
| 33              | Pipecolic acid                           | 2.39           | 1.66     | 11700 | 4500  | 5.27  |
| 34              | 5-Fluoro-Tryptophan                      | 3.32           | 1.32     | 7000  | 2550  | 2.85  |
| 35              | m-tyrosine                               | 2.28           | 1.66     | 10550 | 3250  | 4.46  |
| 36              | Homoserine                               | 1.44           | 1.16     | 16350 | 15700 | 1.37  |
| 37              | p-Nitro-phenylalanine                    | 2.57           | 1.11     | -     | -     | 1.14  |
| 38              | p-Fluoro-phenylalanine                   | 2.05           | 1.11     | 10100 | 6550  | 1.14  |

Table ESI-3: Chromatographic Figures of Merit for Carbonated 60/40 H<sub>2</sub>O/MeOH Conditions

| Compound Number | Amino Acid (D-/L-)                       | $t_{r2}$ (min) | $\alpha$ | $N_1$ | $N_2$ | $R_s$ |
|-----------------|------------------------------------------|----------------|----------|-------|-------|-------|
| 1               | Alanine                                  | 1.76           | 1.46     | 13950 | 11450 | 4.09  |
| 2               | Valine                                   | 1.72           | 1.31     | 12800 | 10300 | 2.78  |
| 3               | Leucine                                  | 2.08           | 1.61     | 11800 | 6150  | 4.83  |
| 4               | Isoleucine                               | 2.08           | 1.64     | 10400 | 6900  | 5.14  |
| 5               | Phenylalanine                            | 2.12           | 1.26     | 8500  | 5900  | 2.40  |
| 6               | Proline                                  | 3.97           | 3.31     | -     | -     | 11.4  |
| 7               | Tryptophan                               | 2.55           | 1.27     | 7300  | 4300  | 2.55  |
| 8               | Serine                                   | 1.43           | 1.16     | -     | -     | 1.21  |
| 9               | Threonine                                | 1.41           | 1.16     | -     | -     | 0.90  |
| 10              | Methionine                               | 2.12           | 1.74     | 9900  | 6950  | 5.68  |
| 11              | Cysteine                                 | 1.64           | 1.41     | -     | -     | 2.29  |
| 12              | Asparagine                               | 1.66           | 1.39     | 4250  | 5150  | 2.01  |
| 13              | Glutamine                                | 1.62           | 2.50     | 11450 | 9750  | 2.50  |
| 14              | Aspartic Acid                            | 1.31           | 1.00     | -     | -     | 0.00  |
| 15              | Lysine                                   | -              | -        | -     | -     | -     |
| 16              | Tyrosine                                 | 1.85           | 1.25     | 8150  | 6600  | 2.06  |
| 17              | Glutamic Acid                            | 1.53           | 1.48     | 8150  | 6650  | 2.53  |
| 18              | Arginine                                 | 14.40          | 1.21     | -     | -     | 2.72  |
| 19              | Histidine                                | 14.23          | 1.00     | -     | -     | 0.00  |
| 20              | o-tyrosine                               | 2.04           | 1.20     | 9450  | 7150  | 2.05  |
| 21              | Norleucine                               | 2.22           | 1.82     | 12150 | 7600  | 6.78  |
| 22              | 2-Fluorophenylalanine                    | 2.08           | 1.27     | 8550  | 5750  | 2.44  |
| 23              | 3-Fluorophenylalanine                    | 2.20           | 1.46     | 8500  | 5150  | 3.74  |
| 24              | 2-Phenylglycine                          | 3.43           | 3.86     | 10050 | 2700  | 11.0  |
| 25              | 3,4-Dihydroxyphenylalanine               | 2.13           | 1.53     | 1200  | 500   | 1.36  |
| 26              | 6-Methyl-Tryptophan                      | 2.83           | 2.37     | 6100  | 3250  | 2.37  |
| 27              | 2-Fluorophenylglycine                    | 2.32           | 2.64     | 9150  | 4300  | 8.06  |
| 28              | Norvaline                                | 2.11           | 1.92     | 13300 | 7950  | 7.10  |
| 29              | Ethionine                                | 2.11           | 1.64     | 10100 | 3500  | 5.22  |
| 30              | $\alpha$ -methyl-m-tyrosine-methyl ester | 1.98           | 1.38     | 9000  | 3800  | 2.70  |
| 31              | 2-aminobutyric acid                      | 1.72           | 1.41     | 14050 | 11550 | 3.69  |
| 32              | p-Bromo-phenylalanine                    | 2.56           | 1.17     | -     | -     | 1.98  |
| 33              | Pipecolic acid                           | 2.63           | 1.88     | 9750  | 5150  | 6.91  |
| 34              | 5-Fluoro-Tryptophan                      | 2.80           | 1.44     | 7100  | 3350  | 3.69  |
| 35              | m-tyrosine                               | 2.29           | 1.84     | 9200  | 3550  | 5.26  |
| 36              | Homoserine                               | 1.53           | 1.24     | 14700 | 12300 | 2.04  |
| 37              | p-Nitro-phenylalanine                    | 2.38           | 1.22     | -     | -     | 1.98  |
| 38              | p-Fluoro-phenylalanine                   | 2.03           | 1.06     | 9050  | 6700  | 2.14  |
